# Supplementary material for: Wolf spider burrows from a modern saline sandflat in central Argentina: morphology, taphonomy and clues for recognition of fossil examples
Source: PeerJ. 2018 Jun 29;6:e5054. doi: 10.7717/peerj.5054 (PMC6027663; doi:10.7717/peerj.5054)
Supplement: Supplemental Information 10 [file peerj-06-5054-s010.xlsx]

## Sheet: Hoja 1
MACN-Ar number	species	Country	Province	Locality	Locality description	Coordinates
31311	Pavocosa gallopavo	Argentina	Santa Fe	Estancia Las Gamas, 16.5 km (by air) W Vera	In open areas of "Bosque Chaqueño"	S29°26'28.824''	W60°23'4.379''
34479	Pavocosa sp.	Argentina	San Juan	Alongside the provincial route 141, 25 km (by air) NW of Caucete	In thorn scrub enviroment of the Monte Ecoregion	S31°45'30.708''	W68°3'6.012''
36018	Pavocosa sp.	Argentina	Río Negro	Los Menucos	Patagonian steepe	S40°49'24.46''	W68°5'6.83''
27407	Pavocosa sp.	Argentina	Formosa	Natural Reserve Formosa, Seccional Río Teuco	Grasslands in Clay soils of "Bosque Chaqueño"	S24°18'42.2''	W61°48'44.499''
